# Supplementary material for: The side chain effect on difluoro-substituted dibenzo[a,c]phenazine based conjugated polymers as donor materials for high efficiency polymer solar cells
Source: Royal Society of Chemistry journal article supplement (doi:10.1039/c4py01276c), 2014-12-05

## Supporting Information

# Side chain effect on difluoro-substituted dibenzo[a,c]phenazine based conjugated polymers as donor materials for high efficiency polymer solar cells

Guangwu Li, Zhen Lu, Cuihong Li\* and Zhishan Bo\*

## Experimental Part

**Materials and Instruments.** Unless otherwise noted, all chemicals were purchased from Aldrich or Acros and used without further purification. The catalyst precursor Pd(PPh<sub>3</sub>)<sub>4</sub> was prepared according to the literature<sup>39</sup> and stored in a Schlenk tube under nitrogen atmosphere. Tetrahydrofuran (THF) and diethyl ether (Et<sub>2</sub>O) were distilled from sodium with benzophenone as an indicator under nitrogen atmosphere. Hexane and dichloromethane (DCM) were distilled from CaH<sub>2</sub>. Chloroform (CF) was distilled before use. All reactions were performed under an atmosphere of nitrogen and monitored by thin layer chromatography (TLC) on silica gel 60 F254 (Merck, 0.2 mm). Column chromatography was carried out on silica gel (200-300 mesh). <sup>1</sup>H and <sup>13</sup>C NMR spectra were recorded on a Bruker AV 400 spectrometer. UV-visible absorption spectra were obtained on a PerkinElmer UV-vis spectrometer model Lambda 750. Elemental analyses were performed on a Flash EA 1112 analyzer. Thermal gravimetric analysis (TGA) and differential scanning calorimetry (DSC) measurements were performed on TA2100 and Perkin-Elmer Diamond DSC instrument, respectively, under a nitrogen atmosphere at a heating rate of 10 °C/min to record TGA and DSC curves. Gel permeation chromatography (GPC) measurements were performed at 150 °C on a PL-220 (Polymer Laboratories) chromatography connected to a differential refractometer with 1,2,4-trichlorobenzene (TCB) as an

eluent. Atomic force microscopy (AFM) measurements were performed under ambient conditions using a Digital Instrument Multimode Nanoscope IIIA operating in the tapping mode. The thickness of the blend films was determined by a Dektak 6 M surface profilometer. The powdery X-ray diffraction (XRD) patterns were collected using a PANalytical X'Pert PRO MPD diffractometer with Cu KR radiation. The electrochemical behavior of the polymers was investigated using cyclic voltammetry (CHI 630A Electrochemical Analyzer) with a standard three-electrode electrochemical cell in a 0.1 M  $\text{Bu}_4\text{NPF}_6$  solution in  $\text{CH}_3\text{CN}$  at room temperature under an atmosphere of nitrogen with a scanning rate of 0.1 V/S. A Pt plate working electrode, a Pt wire counter electrode, and an  $\text{Ag}/\text{AgNO}_3$  (0.01 M in  $\text{CH}_3\text{CN}$ ) reference electrode were used. The experiments were calibrated with the standard ferrocene/ferrocenium ( $\text{F}_c$ ) redox system and assumption that the energy level of  $\text{F}_c$  is 4.8 eV below vacuum.

#### **Fabrication and Characterization of Organic Field-Effect Transistors (OFETs)**

Bottom-contact devices were fabricated based on  $\text{Si}/\text{SiO}_2$  substrates (the back low resistance Si as gate,  $\text{SiO}_2$  (500 nm) as gate insulator). Polymer thin films were spin-coated on the OTS-modified  $\text{Si}/\text{SiO}_2$  substrate from 1,2-dichlorobenzene (DCB) solutions. Electrodes of Au (25 nm) were vacuum deposited on polymer thin films.

**Polymer Solar Cell Fabrication and Characterization.** PSCs were fabricated with the device configuration of  $\text{ITO}/\text{ZnO}/\text{polymer}:\text{PC}_{71}\text{BM}/\text{MoO}_3/\text{Ag}$ .<sup>1</sup> The conductivity of ITO was  $20 \Omega/\square$ . The blend of polymers and  $\text{PC}_{71}\text{BM}$  was dissolved in 1,2-dichlorobenzene (DCB) and heated at 100 °C overnight to ensure sufficient dissolution, and then spin-coated onto ZnO layer. The top electrode was thermally evaporated, with a 7 nm  $\text{MoO}_3$  layer, then followed by 100 nm of Ag at a pressure of  $10^{-4}$  Pa through a shadow mask. Five cells were fabricated on one substrate with an effective area of  $0.04 \text{ cm}^2$ . The measurement of devices was conducted in air without encapsulation. Current-voltage characteristics were recorded using an Agilent B2902A Source Meter under an AM1.5G AAA class solar simulator (model XES-301S, SAN-EI) with an intensity of  $100 \text{ mWcm}^{-2}$  as the white light source and the intensity was calibrated with a standard single-crystal Si photovoltaic cell. The

temperature while measuring the  $J$ - $V$  curves was approximately 25 °C.

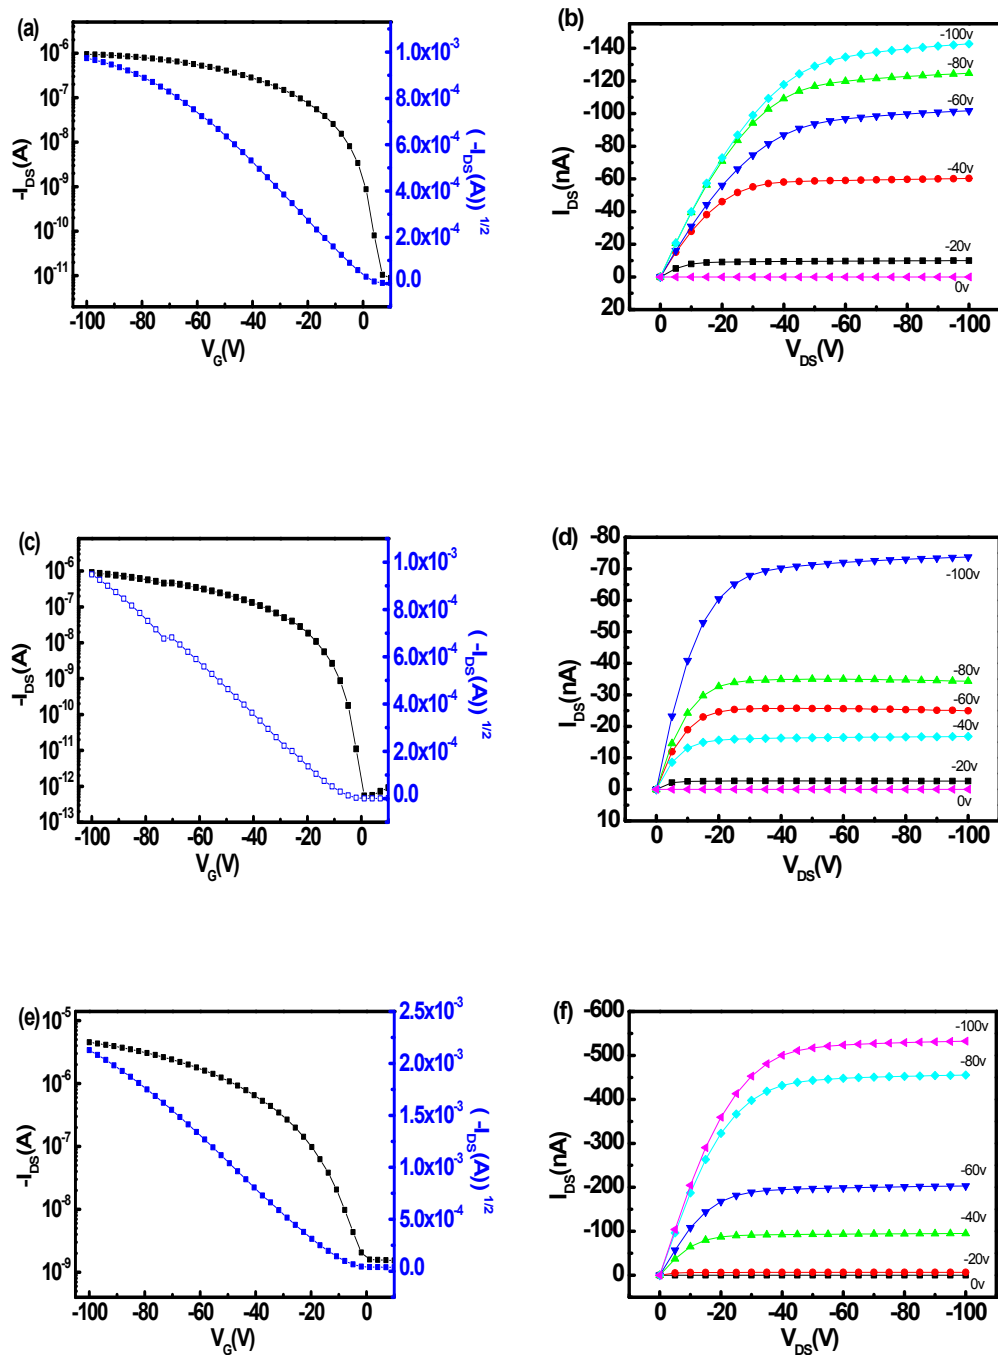

Figure S1. Transfer characteristic and output characteristic of the OFET for **P1** (a, b), **P2-L** (c, d), **P2-H** (e, f)

**Table S1.** Detailed OFET results of polymers **P1**, **P2-L**, and **P2-H**.

| Polymer   | Annealing temperature | Device number | $\mu$ (cm <sup>2</sup> /Vs) | V <sub>T</sub> (V) | on/off |
|-----------|-----------------------|---------------|-----------------------------|--------------------|--------|
| <b>P1</b> | No annealing          | 1             | 2.14E-03                    | -2.56E+00          | 9.2E+4 |
|           |                       | 2             | 1.72E-03                    | -8.25E-01          | 5.5E+4 |
|           |                       | 3             | 1.77E-03                    | 1.17E+00           | 7.9E+4 |
|           |                       | 4             | 1.55E-03                    | 4.82E+00           | 5.0E+4 |
|           |                       | 5             | 1.53E-03                    | 4.64E+00           | 4.7E+4 |
|           | Average value         |               | 1.74E-03                    |                    |        |
| <b>P1</b> | 50 °C                 | 1             | 4.24E-03                    | 1.70E+00           | 1.1E+5 |
|           |                       | 2             | 3.82E-03                    | 1.16E+00           | 1.2E+5 |
|           |                       | 3             | 3.62E-03                    | 1.20E+00           | 1.1E+5 |
|           |                       | 4             | 3.61E-03                    | 2.64E+00           | 4.7E+4 |
|           | Average value         |               | 3.82E-03                    |                    |        |
| <b>P1</b> | 100 °C                | 1             | 2.45E-03                    | 1.55E+00           | 8.3E+4 |
|           |                       | 2             | 2.38E-03                    | 1.38E+00           | 8.0E+4 |
|           |                       | 3             | 2.49E-03                    | 1.82E+00           | 7.6E+4 |
|           |                       | 4             | 2.55E-03                    | 1.43E+00           | 7.8E+4 |
|           | Average value         |               | 2.47E-03                    |                    |        |
| <b>P1</b> | 150 °C                | 1             | 2.66E-03                    | -7.05E-01          | 9.0E+4 |
|           |                       | 2             | 2.68E-03                    | -4.49E-01          | 8.8E+4 |
|           |                       | 3             | 2.72E-03                    | -4.68E-01          | 1.0E+4 |
|           |                       | 4             | 2.85E-03                    | -4.49E-01          | 1.1E+4 |
|           |                       | 5             | 2.67E-03                    | 1.14E+00           | 7.3E+4 |
|           |                       | 6             | 2.88E-03                    | 1.32E+00           | 8.8E+4 |
|           | Average value         |               | 2.74E-03                    |                    |        |
| <b>P1</b> | 200 °C                | 1             | 2.69E-03                    | 8.20E-01           | 1.0E+5 |
|           |                       | 2             | 3.02E-03                    | 1.03E+00           | 1.1E+5 |
|           |                       | 3             | 2.81E-03                    | 8.98E-01           | 1.1E+5 |

|             |               |   |          |           |             |
|-------------|---------------|---|----------|-----------|-------------|
|             |               | 4 | 3.00E-03 | 1.05E+00  | 9.5E+4      |
|             |               | 5 | 4.43E-03 | 2.18E+00  | 1.2E+5      |
|             |               | 6 | 3.94E-03 | 1.95E+00  | 1.1E+5      |
|             |               | 7 | 3.75E-03 | 2.10E+00  | 8.9E+4      |
|             |               | 8 | 3.91E-03 | 2.07E+00  | 1.0E+5      |
|             | Average value |   | 2.74E-03 |           |             |
| <b>P1</b>   | 250 °C        | 1 | 1.76E-03 | 4.24E+00  | 6.0E+4      |
|             |               | 2 | 2.07E-03 | 1.61E+00  | 7.0E+4      |
|             |               | 3 | 2.32E-03 | 2.22E+00  | 8.2E+4      |
|             |               | 4 | 2.47E-03 | 2.00E+00  | 4.4E+4      |
|             |               | 5 | 2.54E-03 | 8.70E-01  | 9.1E+4      |
|             |               | 6 | 2.37E-03 | 1.53E+00  | 8.5E+4      |
|             | Average value |   | 2.25E-03 |           |             |
| <b>P2-L</b> | No annealing  | 1 | 1.10E-03 | -9.69E+00 | 3.4E+5      |
|             |               | 2 | 1.00E-03 | -7.41E+00 | 4.3E+5      |
|             |               | 3 | 1.14E-03 | -8.98E+00 | 9.4E+4      |
|             |               | 4 | 1.09E-03 | -8.58E+00 | 1.1E+5      |
|             | Average value |   | 1.08E-03 |           |             |
| <b>P2-L</b> | 80 °C         | 1 | 1.14E-03 | -7.12E+00 | 4.0E+5      |
|             |               | 2 | 1.11E-03 | -6.24E+00 | 4.4E+5      |
|             |               | 3 | 1.12E-03 | -5.98E+00 | 4.8E+5      |
|             |               | 4 | 1.17E-03 | -5.90E+00 | 5.1E+5      |
|             | Average value |   | 1.13E-03 |           |             |
| <b>P2-L</b> | 140 °C        | 1 | 1.83E-03 | -5.36E+00 | 6.1E+5      |
|             |               | 2 | 1.85E-03 | -5.70E+00 | 7.9E+5      |
|             |               | 3 | 1.84E-03 | -5.88E+00 | 8.0E+5      |
|             |               | 4 | 1.91E-03 | -5.62E+00 | 8.2E+5      |
|             | Average value |   | 1.86E-03 |           |             |
| <b>P2-L</b> | 200 °C        | 1 | 4.19E-03 | -2.37E+01 | 1.3E+6      |
|             |               | 2 | 4.34E-03 | -2.33E+01 | 1.5E+6      |
|             |               | 3 | 4.39E-03 | -2.19E+01 | 1.6E+6      |
|             |               | 4 | 4.43E-03 | -2.24E+01 | 1.7E+6      |
|             | Average value |   | 4.34E-03 |           |             |
| <b>P2-H</b> | No annealing  | 1 | 2.96E-03 | -3.62E+00 | 167.6955E+3 |
|             |               | 2 | 2.66E-03 | -3.60E+00 | 165.4545E+3 |

|             |               |   |          |           |             |
|-------------|---------------|---|----------|-----------|-------------|
|             |               | 3 | 2.45E-03 | -3.48E+00 | 176.6535E+3 |
|             |               | 4 | 2.33E-03 | -3.73E+00 | 168.0563E+3 |
|             |               | 5 | 2.32E-03 | -1.22E+00 | 134.1907E+3 |
|             | Average value |   | 1.89E-03 |           |             |
| <b>P2-H</b> | 50 °C         | 1 | 3.86E-03 | -2.12E+00 | 1.7E+5      |
|             |               | 2 | 3.69E-03 | -3.70E+00 | 1.6E+5      |
|             |               | 3 | 3.40E-03 | -3.59E+00 | 1.6E+5      |
|             |               | 4 | 3.71E-03 | -3.85E+00 | 1.7E+5      |
|             |               | 5 | 4.26E-03 | -2.98E+00 | 3.9E+4      |
|             |               | 6 | 4.17E-03 | -2.84E+00 | 2.2E+4      |
|             | Average value |   | 3.85E-03 |           |             |
| <b>P2-H</b> | 100 °C        | 1 | 4.96E-03 | -2.53E+00 | 2.3E+5      |
|             |               | 2 | 5.03E-03 | -2.08E+00 | 2.5E+3      |
|             |               | 3 | 4.62E-03 | -2.66E+00 | 2.3E+5      |
|             |               | 4 | 4.64E-03 | -2.50E+00 | 2.3E+5      |
|             |               | 5 | 4.75E-03 | -2.44E+00 | 2.6E+5      |
|             |               | 6 | 4.42E-03 | -3.05E+00 | 2.6E+5      |
|             | Average value |   | 4.74E-03 |           |             |
| <b>P2-H</b> | 150 °C        | 1 | 4.68E-03 | -2.01E+00 | 2.2E+5      |
|             |               | 2 | 4.82E-03 | -1.92E+00 | 2.8E+5      |
|             |               | 3 | 5.59E-03 | -2.58E+00 | 2.7E+5      |
|             |               | 4 | 5.59E-03 | -3.74E+00 | 3.5E+5      |
|             |               | 5 | 4.52E-03 | -1.17E+00 | 2.8E+5      |
|             | Average value |   | 5.04E-03 |           |             |
| <b>P2-H</b> | 200 °C        | 1 | 7.44E-03 | -2.53E+00 | 4.5E+5      |
|             |               | 2 | 6.39E-03 | -2.22E+00 | 4.2E+5      |
|             |               | 3 | 6.93E-03 | -1.03E+01 | 3.9E+5      |
|             |               | 4 | 5.70E-03 | -2.15E+00 | 3.8E+5      |
|             |               | 5 | 7.29E-03 | -2.14E+00 | 3.5E+5      |
|             |               | 6 | 1.36E-02 | -7.57E+00 | 8.6E+5      |

|             |               |   |          |           |        |
|-------------|---------------|---|----------|-----------|--------|
|             | Average value |   | 7.90E-03 |           |        |
| <b>P2-H</b> | 250 °C        | 1 | 1.38E-02 | -7.47E+00 | 8.7E+5 |
|             |               | 2 | 1.54E-02 | -9.26E+00 | 1.0E+6 |
|             |               | 3 | 1.35E-02 | -8.70E+00 | 9.9E+5 |
|             |               | 4 | 1.37E-02 | -9.84E+00 | 9.2E+5 |
|             |               | 5 | 1.37E-02 | -7.72E+00 | 8.6E+5 |
|             | Average value |   | 1.43E-02 |           |        |

**Table S2.** Detailed device results of polymers

| <b>Polymer:PC<sub>71</sub>BM</b> | <b>Voc (V)</b> | <b>Jsc (mA/cm<sup>2</sup>)</b> | <b>FF</b>   | <b>PCE (%)</b> |
|----------------------------------|----------------|--------------------------------|-------------|----------------|
| <b>P1: PC<sub>71</sub>BM</b>     | <b>0.74</b>    | <b>11.94</b>                   | <b>0.66</b> | <b>5.8</b>     |
|                                  | <b>0.73</b>    | <b>12.48</b>                   | <b>0.63</b> | <b>5.7</b>     |
|                                  | <b>0.73</b>    | <b>11.75</b>                   | <b>0.63</b> | <b>5.5</b>     |
|                                  | <b>0.73</b>    | <b>12.06</b>                   | <b>0.67</b> | <b>5.9</b>     |
|                                  | <b>0.74</b>    | <b>11.91</b>                   | <b>0.64</b> | <b>5.7</b>     |
|                                  | <b>0.73</b>    | <b>11.97</b>                   | <b>0.63</b> | <b>5.5</b>     |
|                                  | <b>0.72</b>    | <b>11.71</b>                   | <b>0.63</b> | <b>5.3</b>     |
|                                  | <b>0.75</b>    | <b>11.84</b>                   | <b>0.62</b> | <b>5.5</b>     |
|                                  | <b>0.75</b>    | <b>12.65</b>                   | <b>0.60</b> | <b>5.7</b>     |
|                                  | <b>0.74</b>    | <b>12.50</b>                   | <b>0.65</b> | <b>6.0</b>     |
| <b>P2-L:PC<sub>71</sub>BM</b>    | <b>0.93</b>    | <b>3.71</b>                    | <b>0.40</b> | <b>1.4</b>     |
|                                  | <b>0.93</b>    | <b>3.39</b>                    | <b>0.44</b> | <b>1.4</b>     |
|                                  | <b>0.93</b>    | <b>3.74</b>                    | <b>0.41</b> | <b>1.4</b>     |
|                                  | <b>0.94</b>    | <b>3.94</b>                    | <b>0.40</b> | <b>1.5</b>     |
|                                  | <b>0.93</b>    | <b>3.26</b>                    | <b>0.45</b> | <b>1.4</b>     |
|                                  | <b>0.93</b>    | <b>4.24</b>                    | <b>0.39</b> | <b>1.6</b>     |
|                                  | <b>0.93</b>    | <b>4.55</b>                    | <b>0.40</b> | <b>1.7</b>     |

|                                           |             |             |             |            |
|-------------------------------------------|-------------|-------------|-------------|------------|
|                                           | <b>0.93</b> | <b>3.79</b> | <b>0.38</b> | <b>1.3</b> |
|                                           | <b>0.94</b> | <b>4.14</b> | <b>0.39</b> | <b>1.5</b> |
|                                           | <b>0.93</b> | <b>4.07</b> | <b>0.40</b> | <b>1.5</b> |
| <b>P2-H:PC<sub>71</sub>BM</b>             | <b>0.94</b> | <b>5.90</b> | <b>0.50</b> | <b>2.8</b> |
|                                           | <b>0.94</b> | <b>4.92</b> | <b>0.52</b> | <b>2.4</b> |
|                                           | <b>0.93</b> | <b>5.46</b> | <b>0.53</b> | <b>2.7</b> |
|                                           | <b>0.94</b> | <b>5.28</b> | <b>0.51</b> | <b>2.5</b> |
|                                           | <b>0.94</b> | <b>5.67</b> | <b>0.50</b> | <b>2.7</b> |
|                                           | <b>0.94</b> | <b>5.28</b> | <b>0.48</b> | <b>2.4</b> |
|                                           | <b>0.94</b> | <b>5.64</b> | <b>0.49</b> | <b>2.6</b> |
|                                           | <b>0.93</b> | <b>5.52</b> | <b>0.49</b> | <b>2.5</b> |
|                                           | <b>0.94</b> | <b>5.67</b> | <b>0.46</b> | <b>2.5</b> |
|                                           | <b>0.94</b> | <b>5.60</b> | <b>0.46</b> | <b>2.4</b> |
| <b>P3HT:PC<sub>71</sub>BM<sup>a</sup></b> | <b>0.53</b> | <b>9.2</b>  | <b>0.65</b> | <b>3.2</b> |

<sup>a</sup> Devices structure: ITO/PEDOT:PSS/P3HT:P<sub>71</sub>CBM/LiF/Al

### Synthesis of monomers and polymers

#### 11,12-Difluoro-10,13-bis(4-octyl-thiophene-2-yl)dibenzo[a,c]phenazine (2)

A mixture of 5,6-difluoro-4,7-bis(4-octylthiophen-2-yl)benzo[c][1,2,5]thiadiazole (1.0 g, 1.8 mmol) and zinc powder (2.314 g, 35.6 mmol) in 100 mL AcOH was heated to 80 °C under nitrogen atmosphere and stirred at this temperature until the color of solution changed to colorless. The mixture was filtrated under nitrogen atmosphere; phenanthrene-9,10-dione (371 mg, 1.8 mmol) was added to the filtrate; and the resulted mixture was heated to 80 °C under nitrogen atmosphere and stirred overnight. Solvent was then removed under reduced pressure, the residue was chromatographically purified by filtration through a short column eluting with toluene:petroleum ether (PE) (1:1) to afford **1** a brick red solid (765 mg, 61%). <sup>1</sup>H NMR (400 MHz, CDCl<sub>3</sub>): δ 9.25-9.40 (m, 2H), 8.35-8.55 (m, 2H), 7.85 (s, 2H), 7.59-7.80 (m, 4H), 7.31 (s, 2H), 2.76 (t, *J* = 7.6 Hz, 4H), 8.99 (d, *J* = 7.6 Hz, 2H), 1.69-1.89 (m, 4H), 1.23-1.60 (m, 20H), 0.91 (t, *J* = 6.4 Hz, 6H). <sup>13</sup>C NMR (100 MHz,



CDCl<sub>3</sub>):  $\delta$  149.05, 142.58, 140.90, 136.01, 132.18, 131.98, 130.41, 130.05, 129.79, 127.71, 127.59, 124.86, 122.35, 117.45, 31.95, 30.64, 30.56, 29.56, 29.52, 29.35, 22.70, 14.11. Anal. Calcd for C<sub>44</sub>H<sub>46</sub>F<sub>2</sub>N<sub>2</sub>S<sub>2</sub>: C 74.96, H 6.58, N 3.97. Found: C 74.72, H 6.64, N 3.65.

11,12-Difluoro-10,13-bis(5-bromo-4-octyl-thiophene-2-yl)dibenzo[a,c]phenazine

### (M1)

To a solution of 11,12-difluoro-10,13-bis-(4-octyl-thiophene-2-yl)-dibenzo[a,c]phenazine (500 mg, 0.71 mmol) in CH<sub>2</sub>Cl<sub>2</sub> (100 mL) at 0 °C was added Br<sub>2</sub> (450 mg, 2.8 mmol) in one portion. The mixture was stirred at this temperature for 10 Min, poured into aqueous Na<sub>2</sub>SO<sub>3</sub> (100 mL), and extracted with CH<sub>2</sub>Cl<sub>2</sub> (100 mL×3). The collected organic phase was dried over anhydrous MgSO<sub>4</sub> and evaporated to dryness. The crude product was purified by filtration through a silica gel column eluting with toluene:PE (1:1) and recrystallization from a solvent mixture of toluene and PE (1:1) to afford **M1** as dark red solid (556 mg, 91%). <sup>1</sup>H NMR (400 MHz, CDCl<sub>3</sub>):  $\delta$  8.99 (d,  $J$  = 7.6 Hz, 2H), 8.28 (d,  $J$  = 8.0 Hz, 2H), 7.6-7.7 (m, 2H), 7.45-7.6 (m, 4H), 2.65 (t,  $J$  = 7.7 Hz, 4H), 1.6-1.8 (m, 4H), 1.2-1.5 (m, 20H), 0.92 (t,  $J$  = 6.9 Hz, 6H). <sup>13</sup>C NMR (100 MHz, CDCl<sub>3</sub>):  $\delta$  148.68, 140.66, 139.94, 134.13, 131.22, 130.77, 129.98, 129.61, 128.49, 127.23, 127.04, 121.77, 115.55, 31.98, 29.76, 29.53, 29.52, 29.40, 22.74, 14.15. Anal. Calcd for C<sub>44</sub>H<sub>44</sub>F<sub>2</sub>Br<sub>2</sub>N<sub>2</sub>S<sub>2</sub>: C 61.25, H 5.14, N 3.25. Found: C 61.23, H 5.69, N 2.84.

### Synthesis of P1

A mixture of 11,12-difluoro-10,13-bis(5-bromo-4-octyl-thiophene-2-yl)dibenzo[a,c]phenazine (**M1**) (100 mg, 0.12 mmol), 4,7-bis(5-bromothiophen-2-yl)-5,6-bis(octyl oxy)benzo[c][1,2,5]thiadiazole (**M3**) (89 mg, 0.12 mmol), toluene (15 mL), and DMF (1.5 mL) was carefully degassed and charged with nitrogen several times before and after Pd(PPh<sub>3</sub>)<sub>4</sub> (1.4 mg, 0.001 mmol) was added. The mixture was heated to reflux and stirred for 1 day; trimethyl(thiophen-2-yl)stannane (15 mg, 0.06 mmol) was added and refluxed for further 6 hours; and then 2-bromothiophene (30 mg, 0.18 mmol) was added and reacted for another 6 hours to finish the end-capping. After cooling down to room temperature, the reaction mixture was poured into methanol

(200 mL). The resulted precipitates were collected by filtration and extracted successively with methanol, ethyl acetate, hexanes, and chloroform in a Soxhlet Apparatus. The residue was dissolved in chlorobenzene at elevated temperature, hot filtrated, and concentrated to a small amount of solvent under reduced pressure. The concentrated polymer solution was poured into 100 mL acetone and the formed precipitates was collected and dried under reduced pressure to afford **P1** as a black solid (90 mg, 87%).

### Synthesis of **P2**

A mixture of 11,12-difluoro-10,13-bis(5-bromo-4-octyl-thiophene-2-yl)dibenzo [a,c]phenazine (**M1**) (139 mg, 0.16 mmol), 4,7-bis(5-bromothiophen-2-yl)-5,6-bis(octyloxy)benzo[c][1,2,5]thiadiazole (**M3**) (200 mg, 0.16 mmol), toluene (15 mL), and DMF (1.5 mL) was carefully degassed and charged with nitrogen several times before and after Pd(PPh<sub>3</sub>)<sub>4</sub> (2.3 mg, 0.002 mmol) was added. The mixture was heated to reflux and stirred for 2 days, trimethyl(thiophen-2-yl)stannane (15 mg, 0.06 mmol) was added and refluxed for further 6 hours, and then 2-bromothiophene (30 mg, 0.18 mmol) was added and reacted for another 6 hours to finish the end-capping. After cooling down to room temperature, the reaction mixture was poured to 200 mL methanol, the resulted precipitates were collected by filtration and extracted successively with methanol, ethyl acetate, hexanes, and chloroform in a Soxhlet Apparatus; The chloroform extract was collected and evaporated to dryness to afford the low molecular weight fraction **P2-L** (125 mg). The residue was dissolved in chlorobenzene at elevated temperature and filtered. After removal of most solvent, the residue was poured into acetone (200 mL), and the formed precipitates were collected by filtration and dried in high vacuum to give the high molecular weight fraction **P2-H** as a dark green solid (90 mg). <sup>1</sup>H NMR (400 MHz, CDCl<sub>3</sub>): δ 9.80-10.20 (br, 2H), 8.60-9.00 (br, 2H), 8.25-8.60 (br, 4H), 8.03-8.25 (br, 2H), 7.91-8.03 (br, 2H), 7.72-7.90 (br, 2H), 2.7-3.7 (br, 12H), 1.29-2.69 (br, 46H), 0.88-1.29 (br, 18H).

### Reference:

1. Y. Sun, J. H. Seo, C. J. Takacs, J. Seifert and A. J. Heeger, *Adv. Mater.*, 2011, **23**, 1679-1683.

8.0272

7.1838  
7.1173

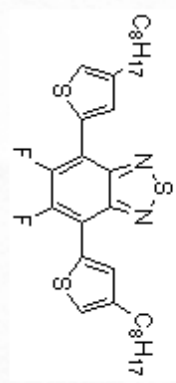

2.6475  
2.6285  
2.6090  
1.6567  
1.6382  
1.6210  
1.6021  
1.5830  
1.3114  
1.2907  
1.2795  
1.2553  
1.2340  
1.2078  
0.8266  
0.8108  
0.7935

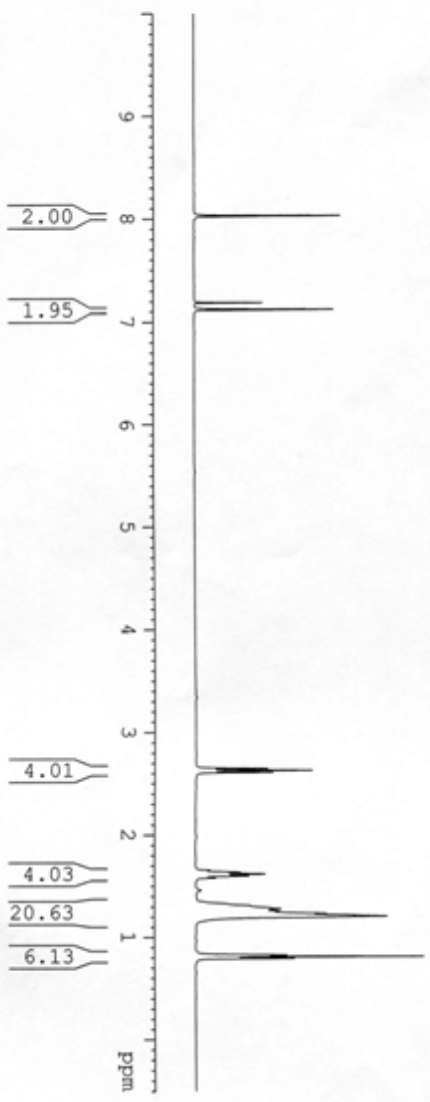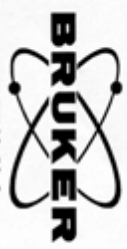

NAME RHD02-58-5  
 EXPNO 1  
 PROCNO 1  
 DATE\_ 20121212  
 TIME 10.23  
 INSTRUM spect  
 PROBRD 5 mm PABBO BB-  
 PULPROG zg30  
 TD 65536  
 F2 63536  
 SOLVENT CDCl3  
 NS 16  
 DS 2  
 SWH 8223.685 Hz  
 FIDRES 0.125483 Hz  
 AQ 3.9846387 sec  
 RG 101  
 DW 60.800 usec  
 DE 6.50 usec  
 TE 288.7 K  
 D1 1.00000000 sec  
 TDO 1

\*\*\*\*\* CHANNEL F1 \*\*\*\*\*  
 NUCL1 1H  
 P1 13.80 usec  
 PL1 -1.00 dB  
 PL1W 13.18669796 W  
 SFO1 400.1724712 MHz  
 SI 32768  
 SF 400.1700341 MHz  
 MDW 0  
 SSB 0  
 LB 0.30 Hz  
 GB 0  
 PC 1.00

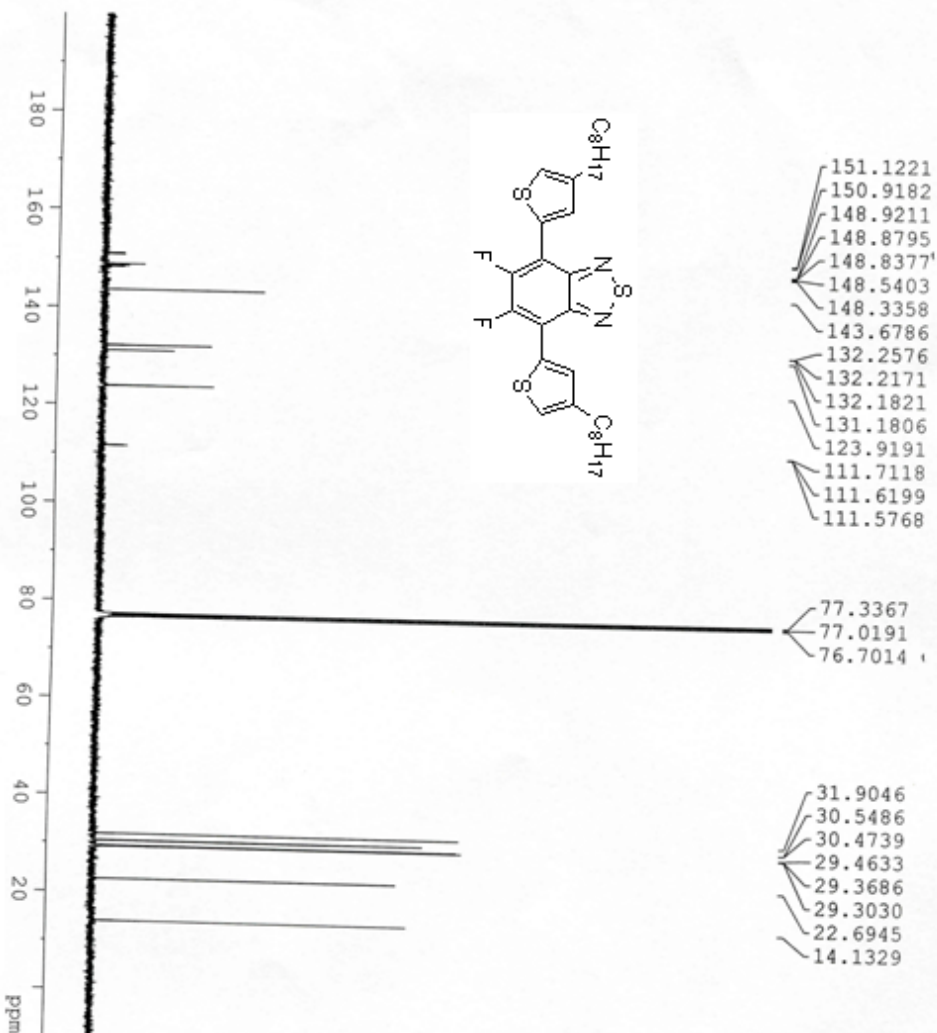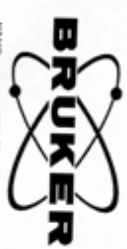

```

NAME      MH002-58-C13
EXPNO    1
PROCNO   1
DATE_    20121213
TIME     14:17
INSTRUM  spect
PROBHD   5 mm PABBO BB-
PULPROG  zgpg30
TD        65536
FIDRES   0.00000000
AQ        1.363128
RG        203
DM        20.800
DE        6.50
TE        292.0
D1        2.00000000
D2        0.03000000
D3        1
T200     1

===== CHANNEL f1 =====
NUC1      13C
P1        8.56
PL1       -2.00
SFO1      100.628888
===== CHANNEL f2 =====
CPROG2    waltz16
NUC2      1H
PCPD2     80.00
PL2       -1.00
PL12      14.26
PL13      14.46
PL14      13.18669796
PL15W     0.3276794
PL13W     0.3276794
SFO2      400.132768
SI         1
SF        100.6288270
WDW        EM
SSB        0
LB         1.00
GB         0
PC         1.40
  
```

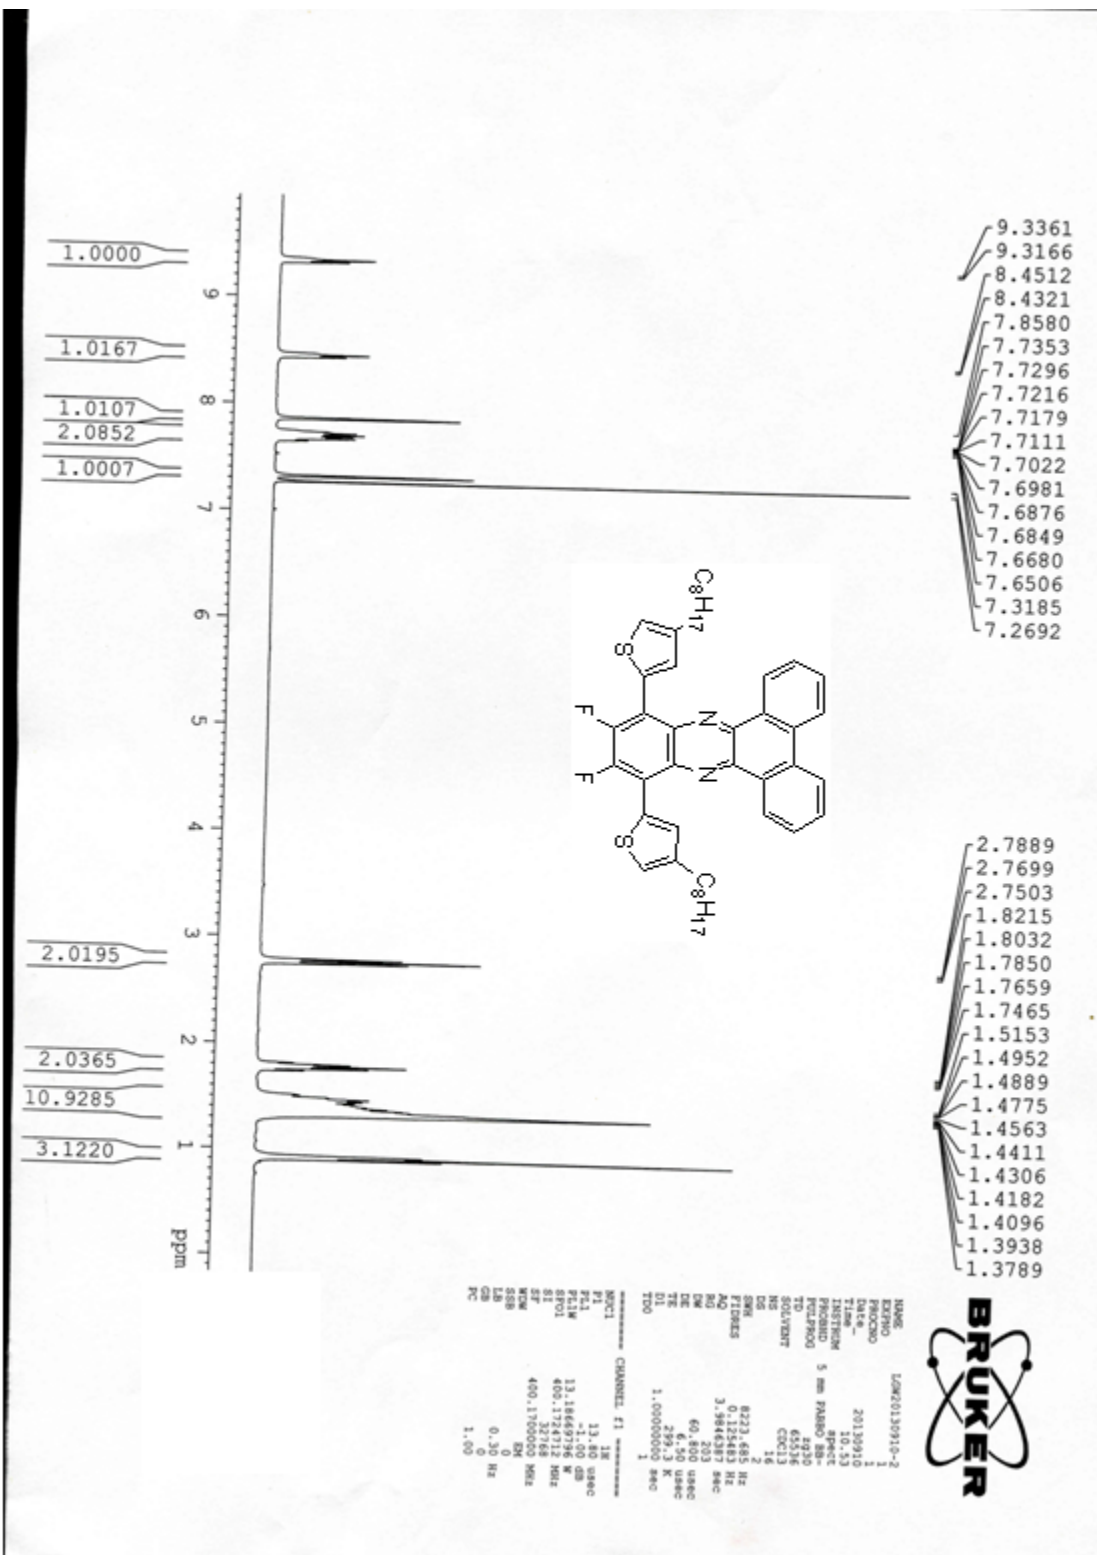

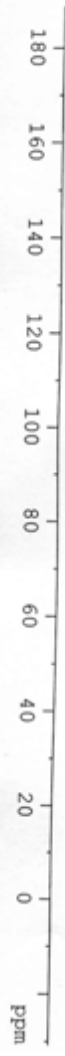

- 148.27
- 148.07
- 142.58
- 140.90
- 136.01
- 132.25
- 132.18
- 132.11
- 131.98
- 130.41
- 130.05
- 129.79
- 127.71
- 127.59
- 124.86
- 122.53
- 117.45

- 31.95
- 30.64
- 30.56
- 29.56
- 29.52
- 29.35
- 22.70
- 14.11

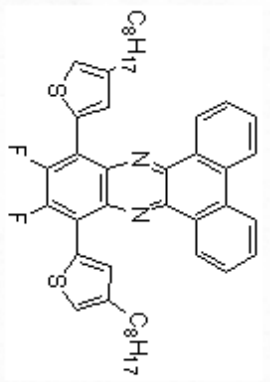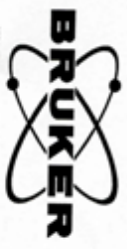

```

NAME      LMR20131003-4-C13
EXTRNO   1
PROCNO   1
Date-    20131005
Time     8.38
INSTRUM  spect
PROBHD   5 mm PABBO BB-
PULPROG  zgpg30
TD       65536
SOLVENT  CDCl3
NS       3000
DS       4
SMB      24038.46 Hz
FIDRES   0.166726 Hz
AQ       1.363198 sec
RG       1.363203
DE       20.800 usec
TE       6.50 usec
D1       298.9 K
D11      2.00000000 sec
D111     0.03000000 sec
T00      1

===== CHANNEL f1 =====
NUC1      13C
P1        8.50 usec
PL1       -2.00 dB
PL1W      57.32743073 W
SFO1      100.628888 MHz

===== CHANNEL f2 =====
CAPPROG2 waltz16
NUC2      1H
PCPD2     90.00 usec
P12       -1.00 dB
PL12      14.26 dB
PL13      14.46 dB
PL2W      13.18669796 W
PL12W     0.39276794 W
PL13W     0.37509048 W
SFO2      400.1716007 MHz
SI        32768
SRW       100.6288870 MHz
SFO2W     400.1716007 MHz
SFB        4
GB         0
PC         1.40
  
```

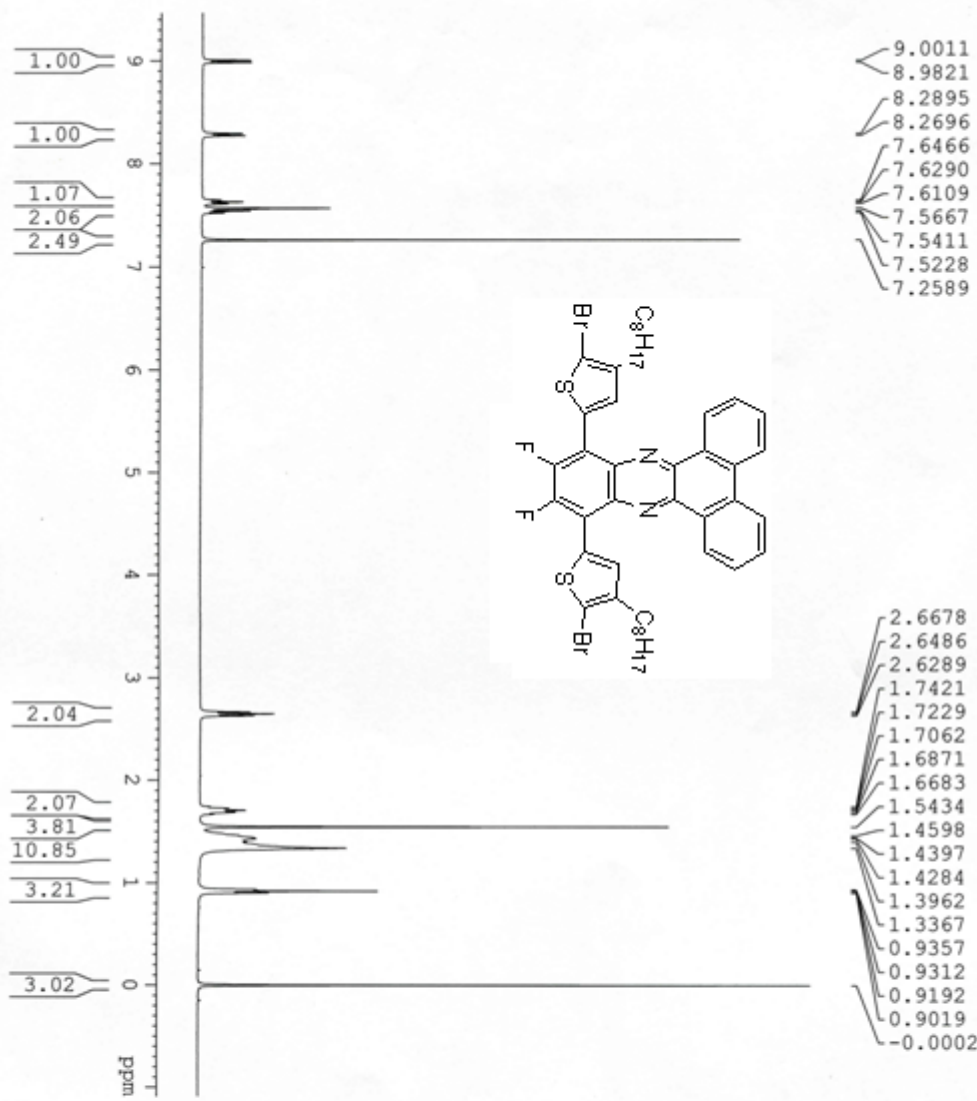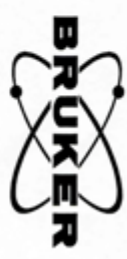

```

NAME LGW20120502-1
EXPNO 1
PROCNO 1
Date_ 20120502
Time_ 20.20
INSTRUM spect
PROBHD 5 mm PABBO BB-
PULPROG zgpg30
TD 65536
SOLVENT CDCl3
NS 16
DS 2
SWH 8223.685 Hz
FIDRES 0.125483 Hz
AQ 3.9846387 sec
RG 203
DM 60.800 usec
DE 6.50 usec
TE 298.5 K
D1 1.00000000 sec
TD0 1

===== CHANNEL f1 =====
NUC1 1H
P1 13.80 usec
PL1 -1.00 dB
PL1W 13.18669796 W
SFO1 400.1724712 MHz
SI 32768
SF 400.1700040 MHz
WDW EM
SSB 0
L8 0.30 Hz
GB 0
PC 1.00
  
```

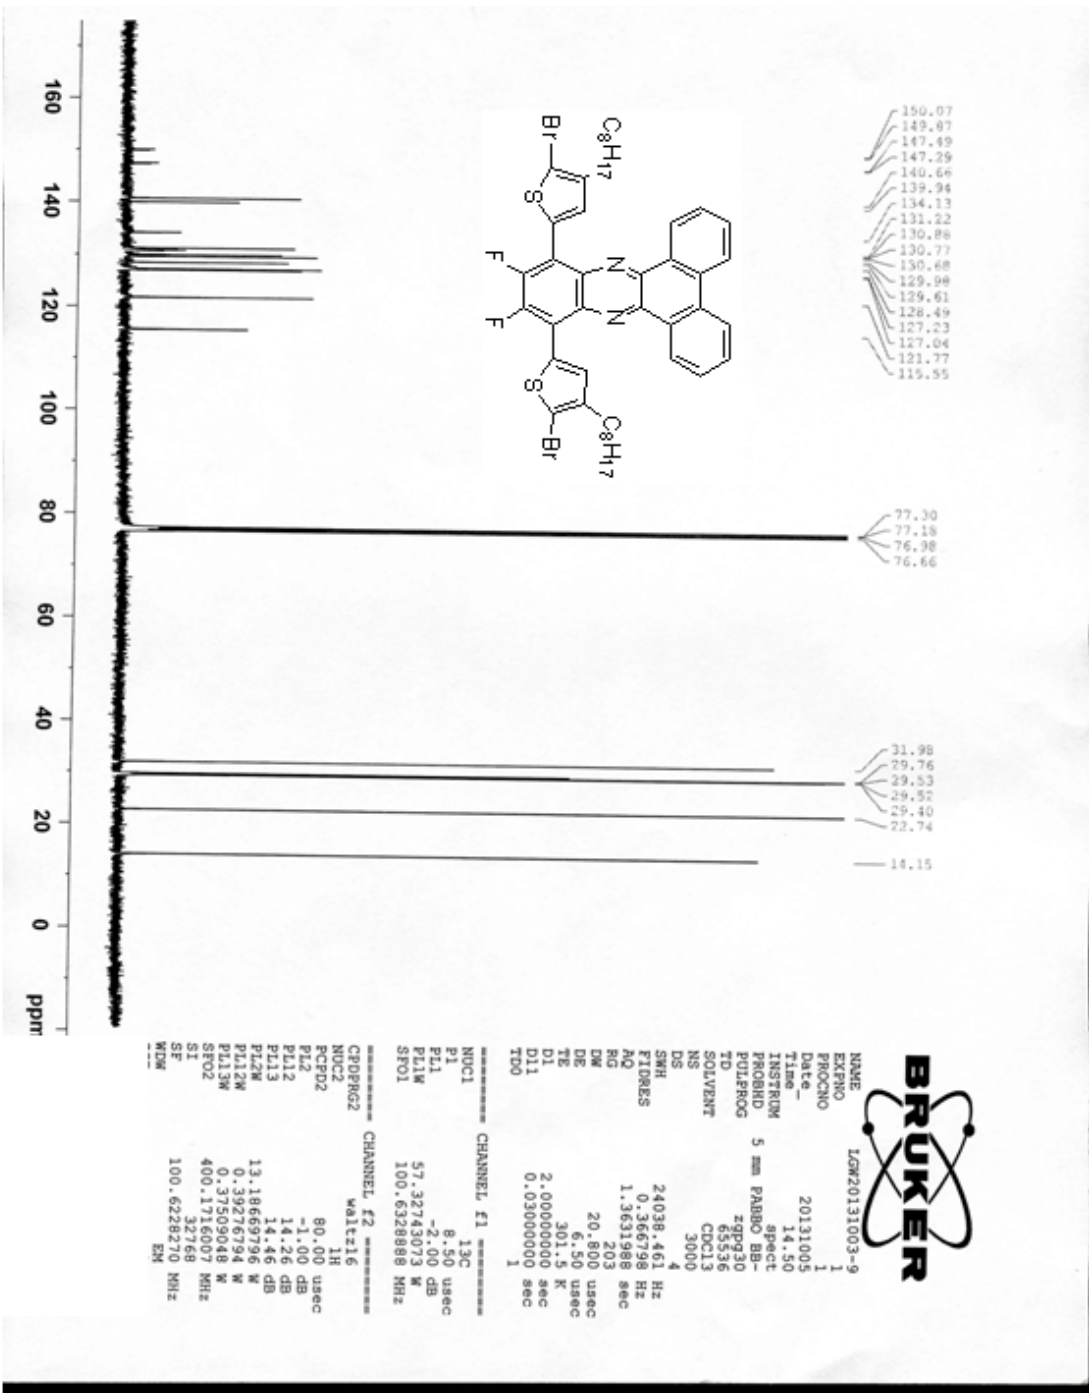



ADVANCE III BRUKER A&T Center BNU  
 Sample: IGM-PI Solvent: o-C6D4Cl2  
 Spectrum: huaxueyuan-bozhishan 0910-3 1H

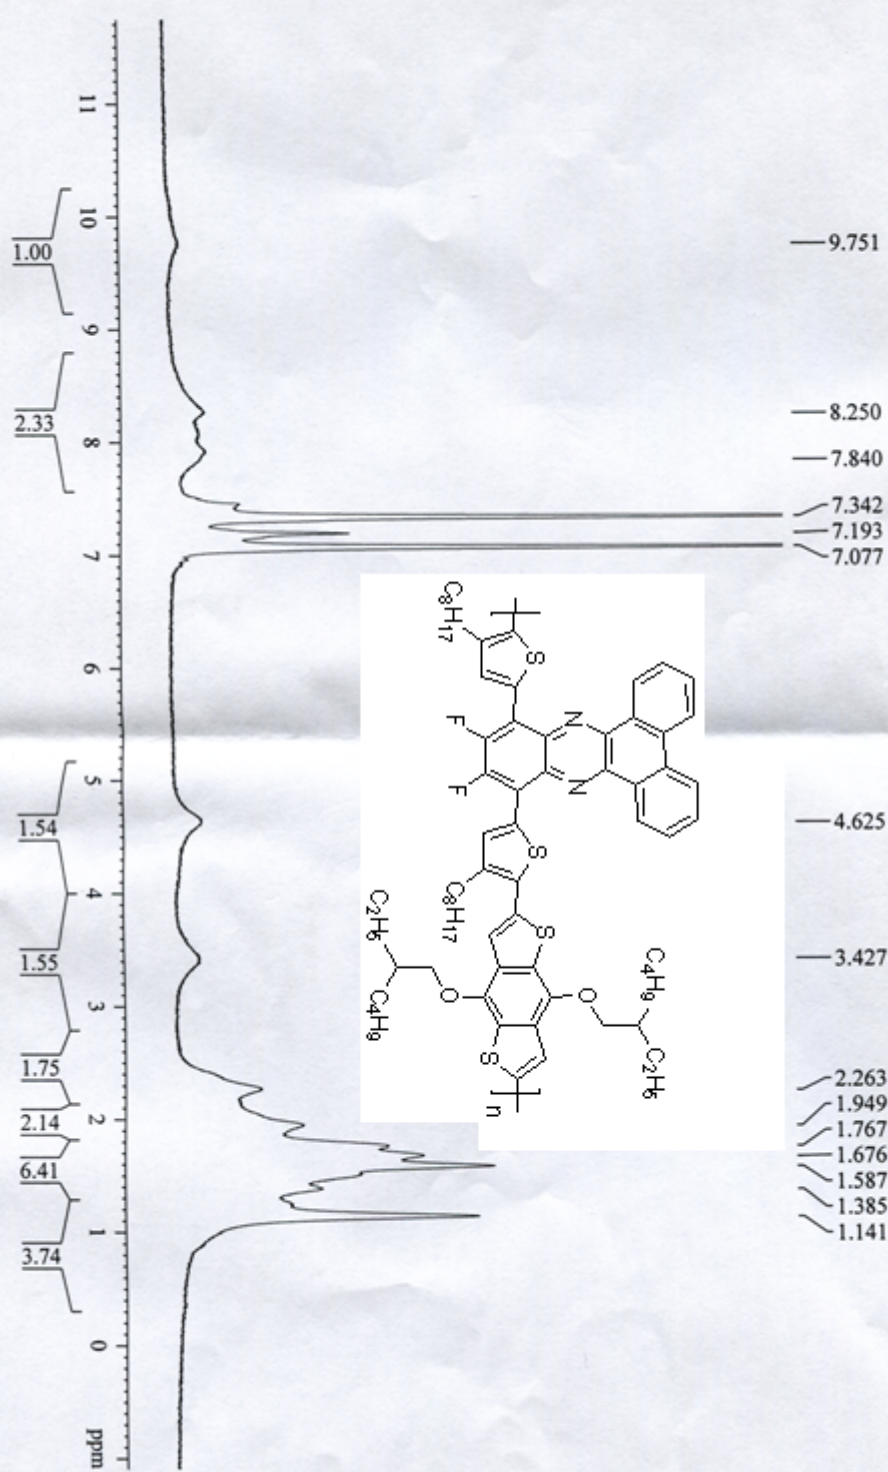

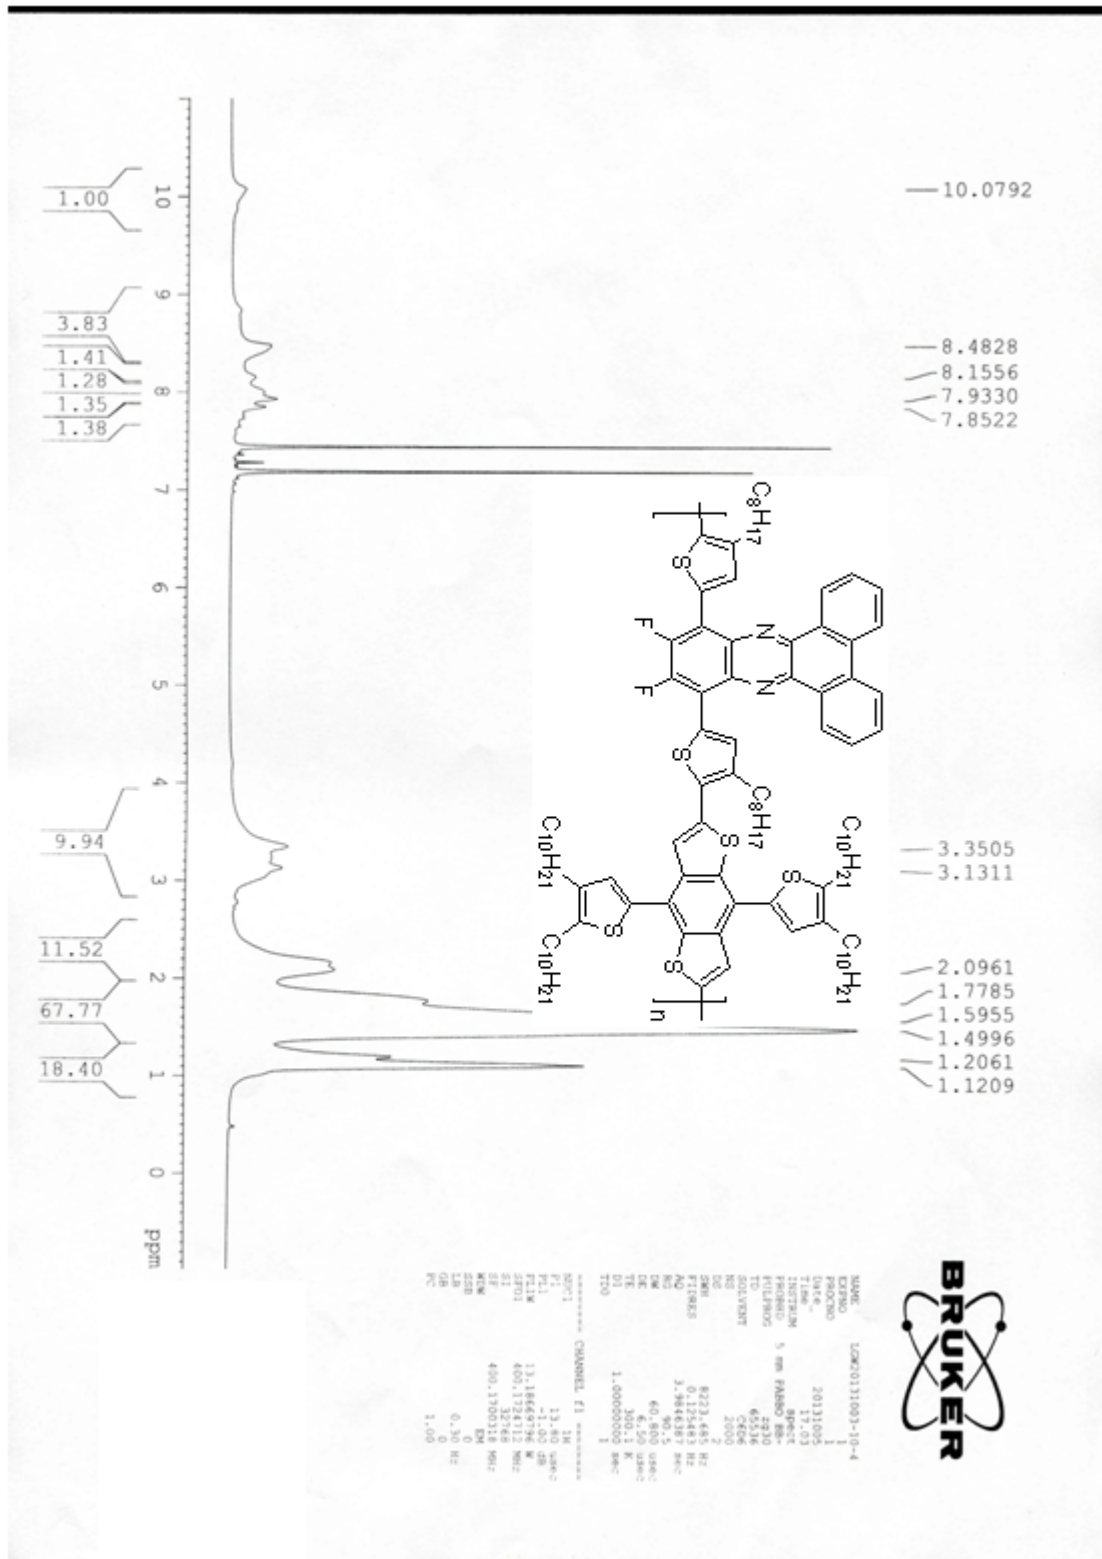

Supplement: c4py01276c1.pdf [file c4py01276c1.pdf]
